# Supplementary material for: GTV-based prescription in SBRT for lung lesions using advanced dose calculation algorithms
Source: Springer Nature journal article supplement (doi:10.1186/s13014-014-0223-5), 2014-10-15
Supplement: MOESM1 [file 9773454]

# GTV-BASED PRESCRIPTION IN SBRT FOR LUNG LESIONS USING ADVANCED DOSE CALCULATION ALGORITHMS

**Thomas Lacornerie<sup>\*</sup>, Albert Lisbona<sup>†</sup>, Xavier Mirabel<sup>‡</sup>,  
Eric Lartigau<sup>‡</sup>, Nick Reynaert<sup>\*</sup>**

<sup>\*</sup>Service de Physique Médicale, Centre Oscar Lambret, Lille, France

<sup>†</sup>Service de Physique Médicale, Institut de Cancérologie de l'Ouest, Nantes, France

<sup>‡</sup>Département Universitaire de Radiothérapie, Centre Oscar Lambret, Lille, France

# Exercise

- ✓ 3 cases with lesions of different sizes
  - <1 cm , ~2 cm, ~4 cm
- ✓ 3 different platforms (linac & TPS), for every case dose calculation using type A algorithm and type B algorithm :
  - Clinac (Pencil Beam et Collapsed Cone)
  - Novalis (Pencil Beam et Monte-Carlo)
  - Cyberknife (Ray-Tracing et Monte-Carlo)

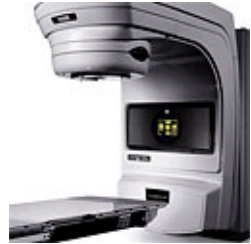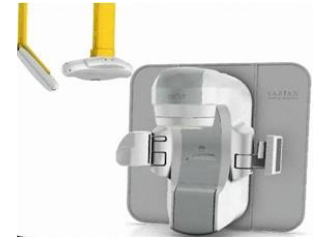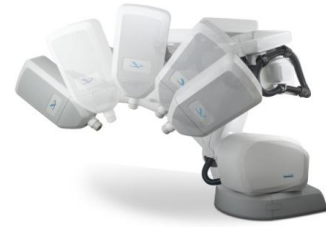

PTV (=GTV+5mm) D95% = 48 Gy

# Case 1 lesion < 1 cm

Clinac

Novalis

Cyberknife

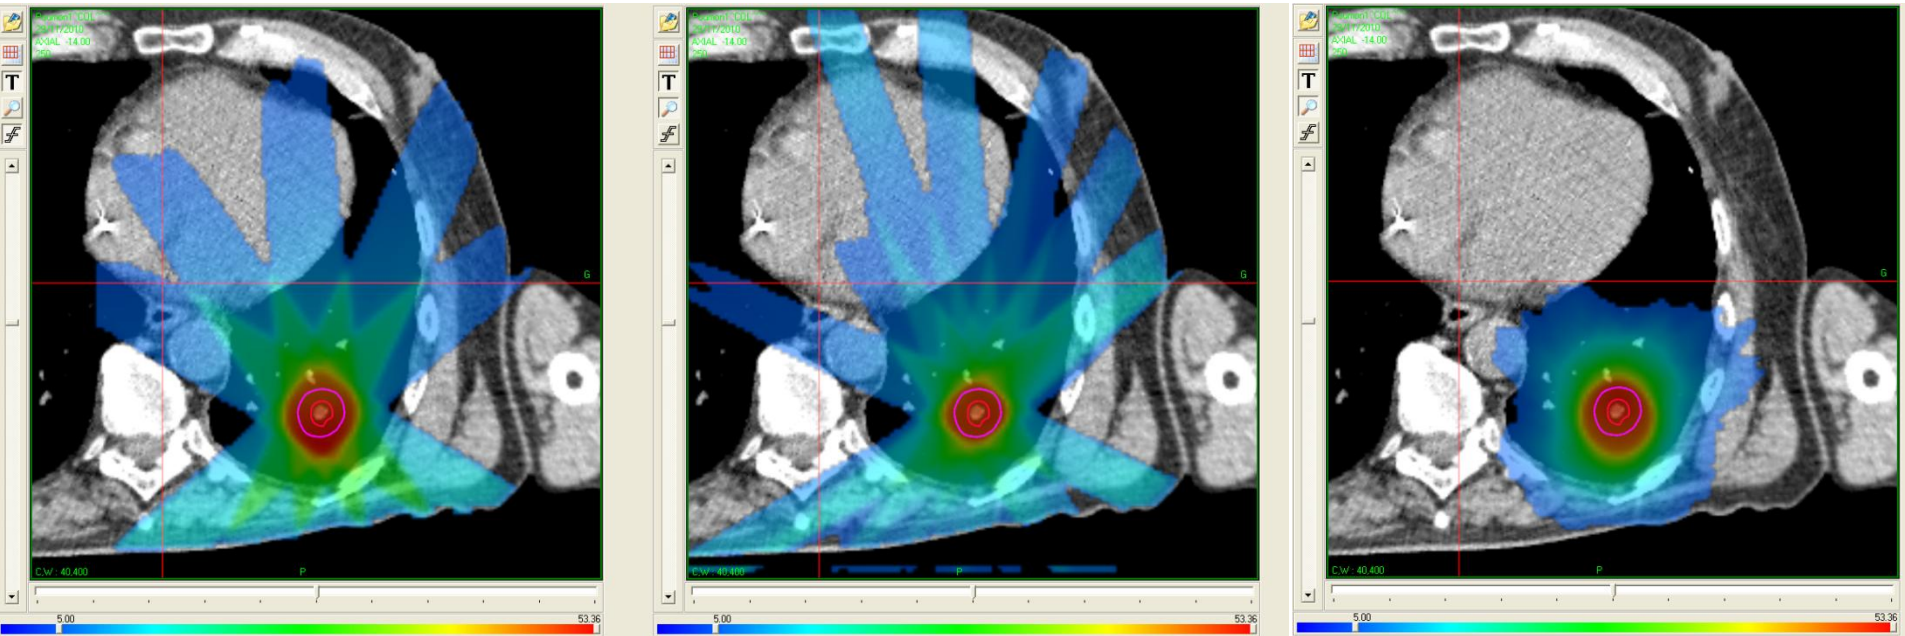

type A algorithms

doses > 5 Gy

# Case 1 lesion < 1 cm

Clinac

Novalis

Cyberknife

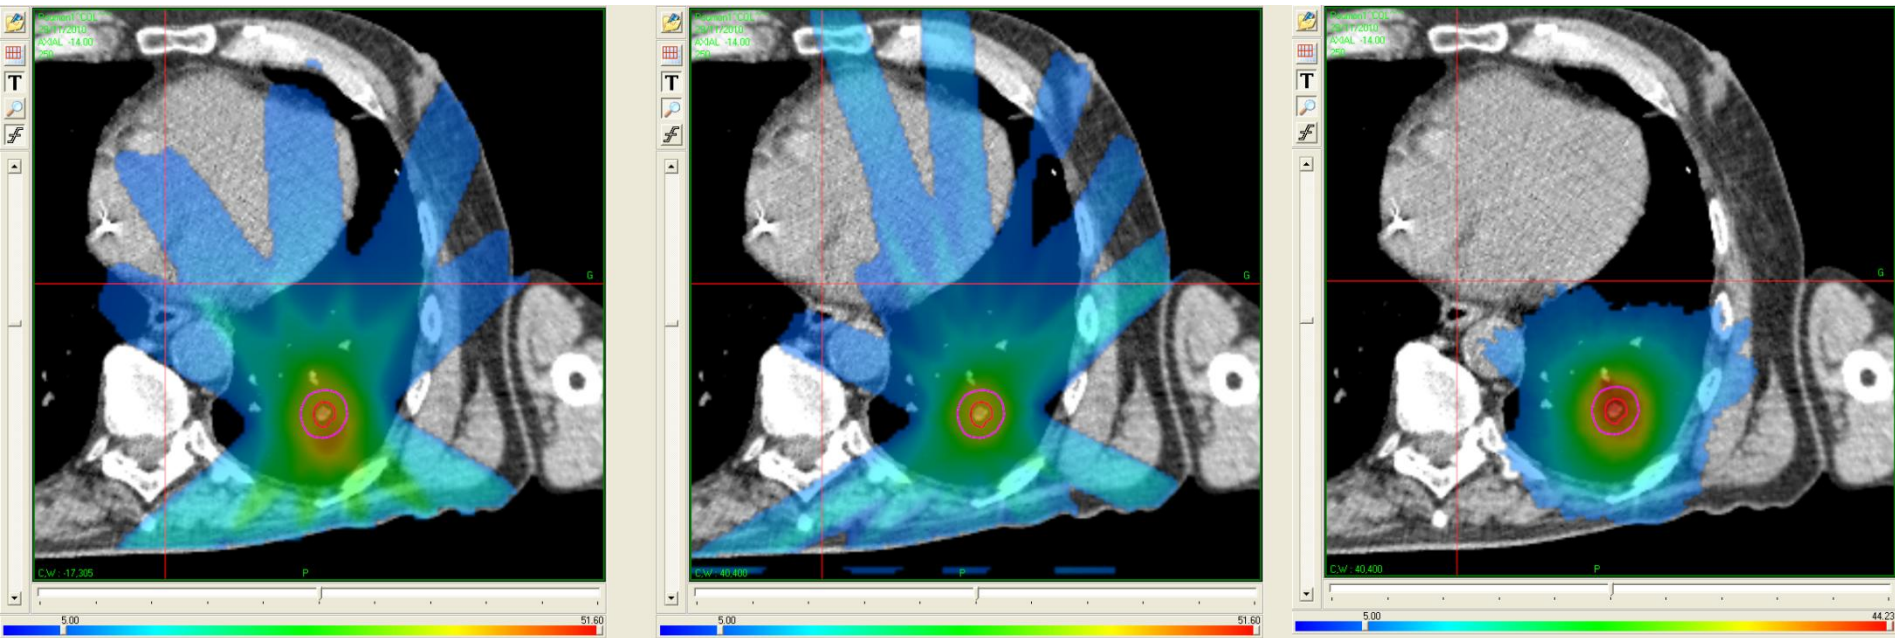

type B algorithms

same plans i.e. same m.u./beam

doses > 5 Gy

# Case 1 lesion < 1 cm

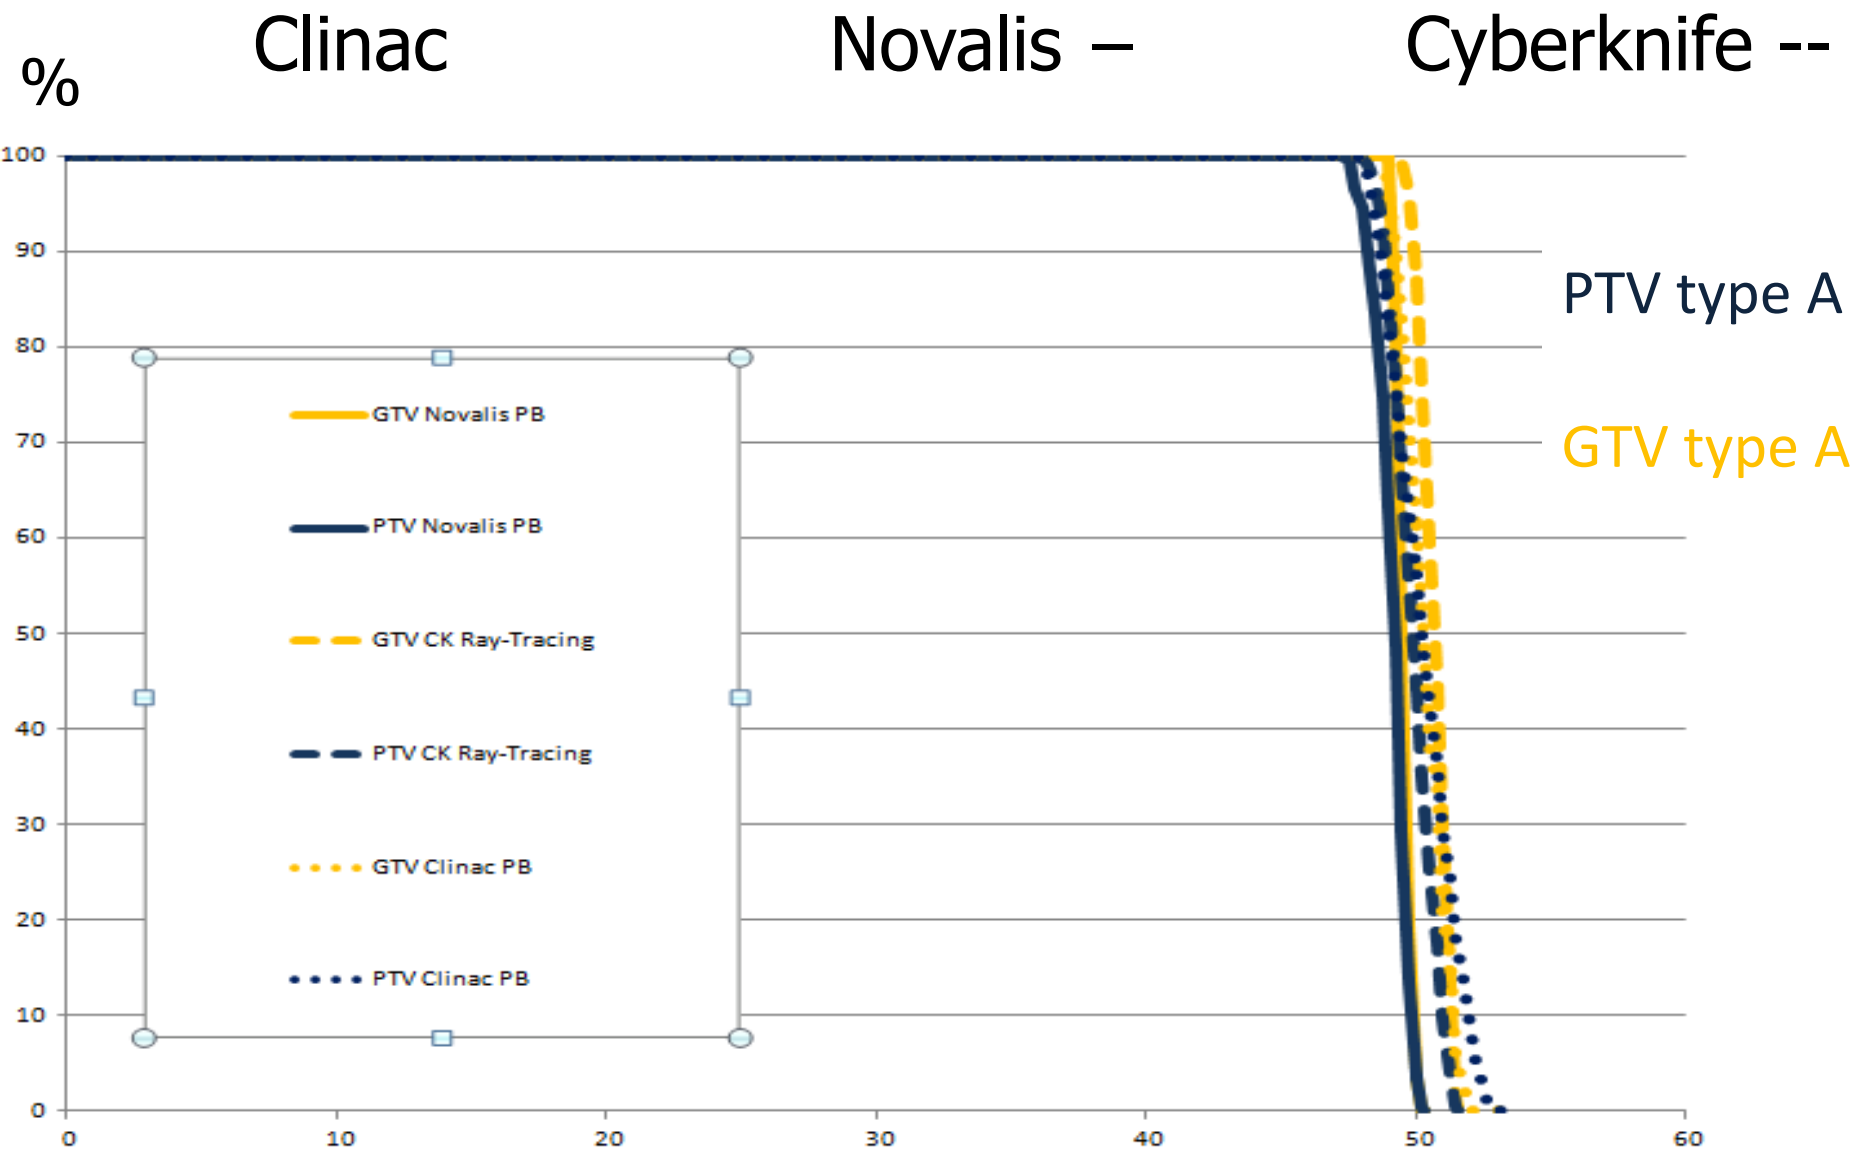

# Case 1 lesion < 1 cm

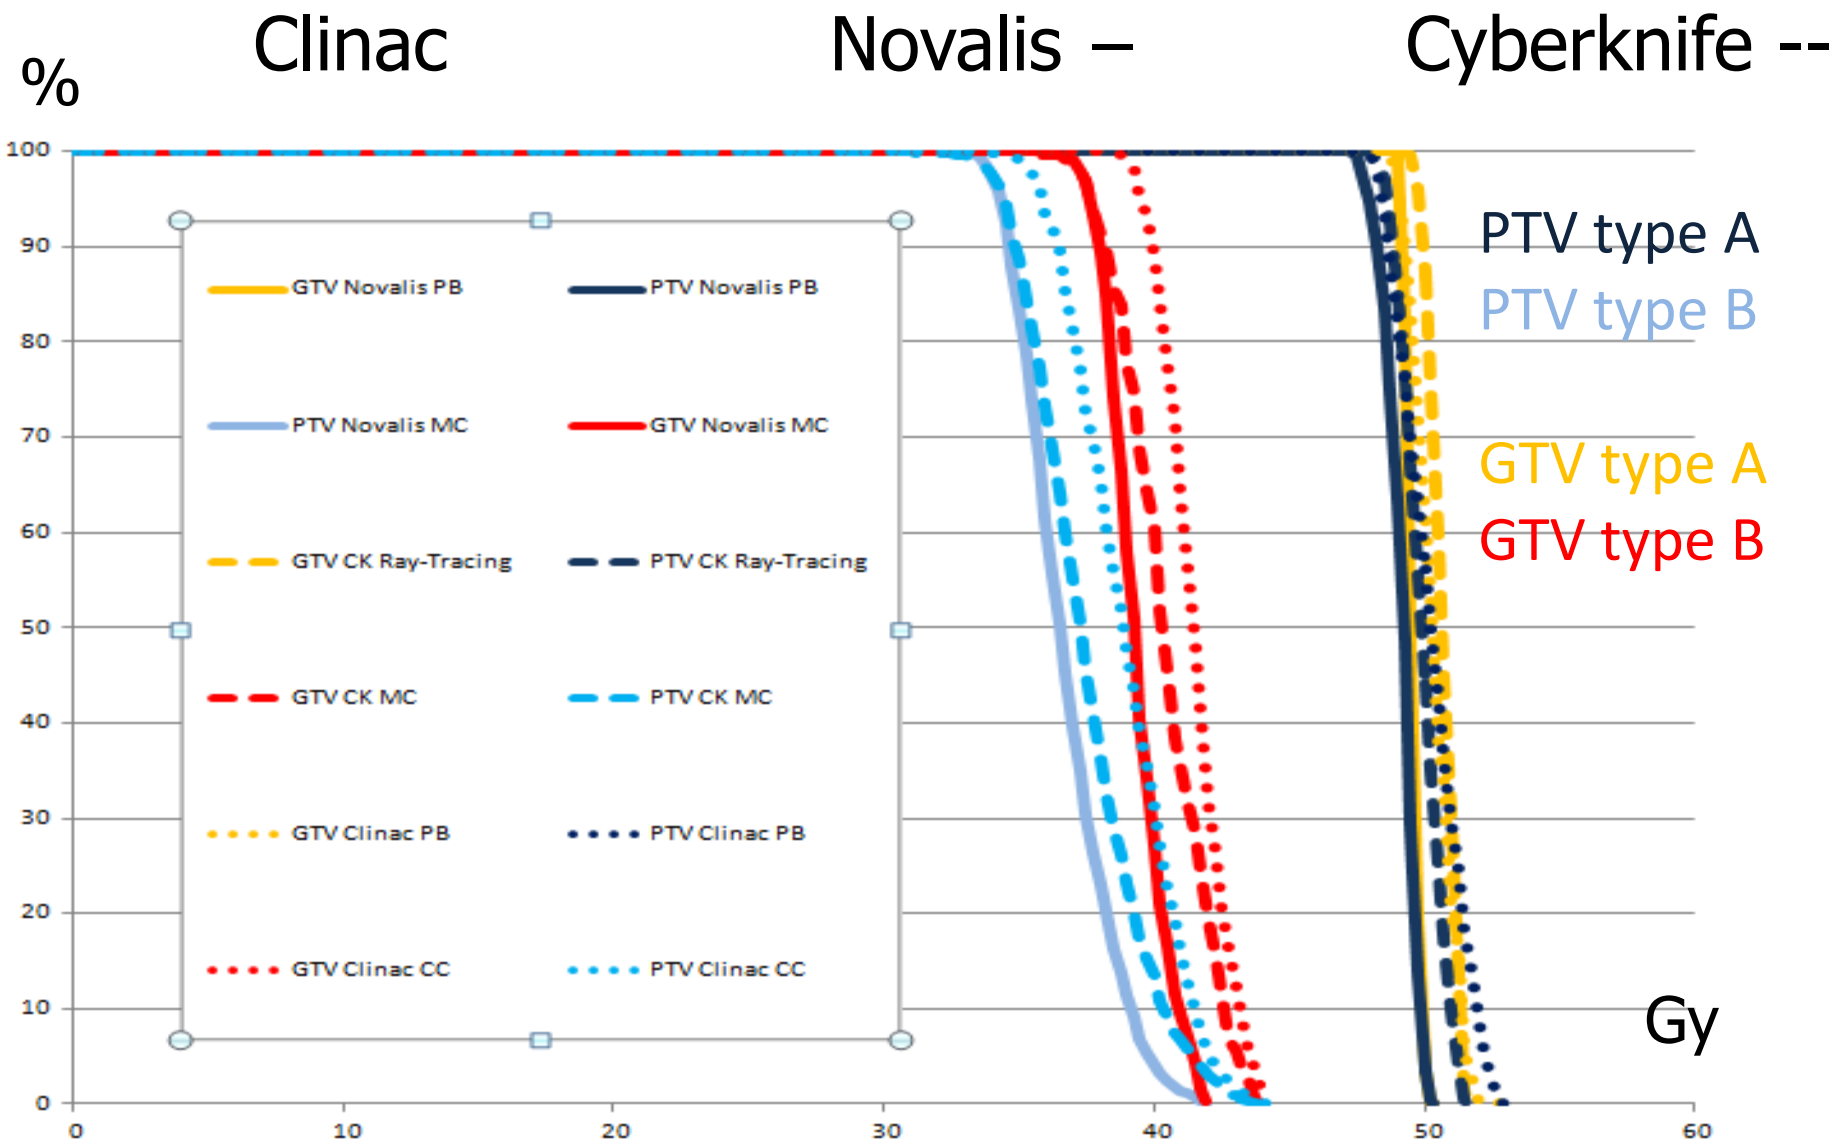



# Algorithms type A & B

- ✓ Type A algorithms overestimate dose because they don't take into account modification of lateral electron transport
- ✓ We have to use type B algorithms or Monte-Carlo which have demonstrated their consistency with measurements



- ✓ Proceed the exercise prescribing 48 Gy to 95% of PTV (=GTV+5 mm) using type B algorithms

# Case 2 (lesion ~2cm)

Novalis

Cyberknife

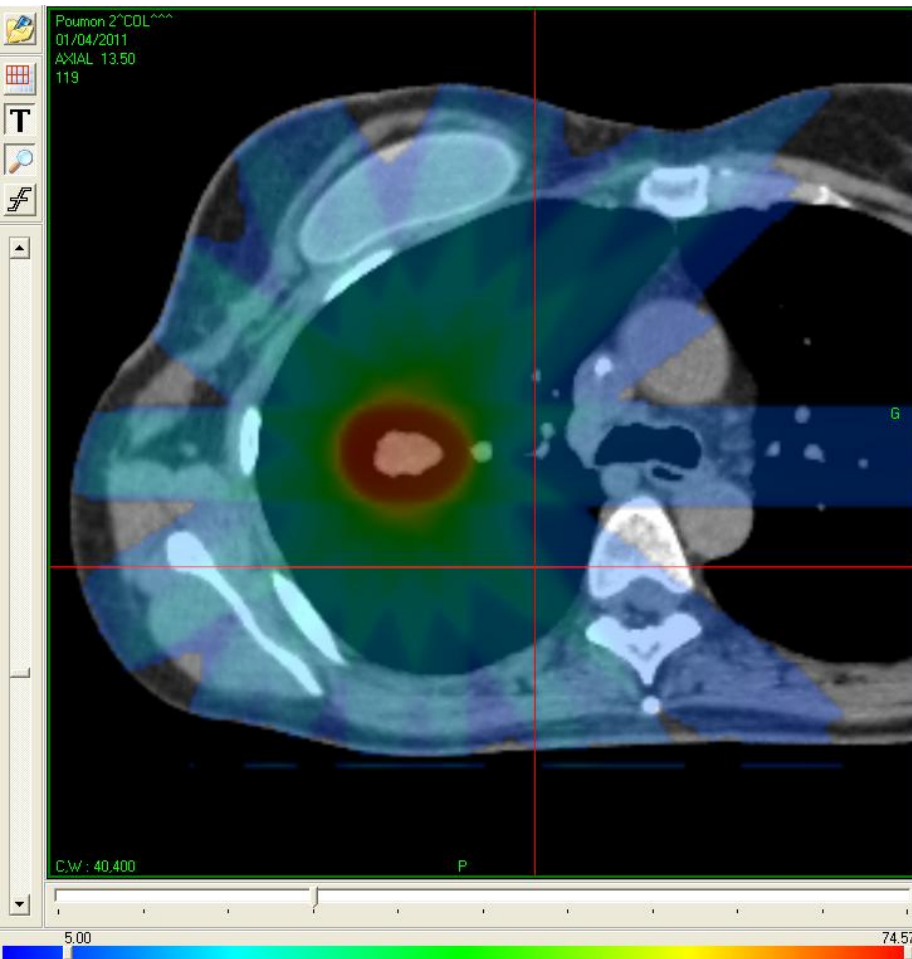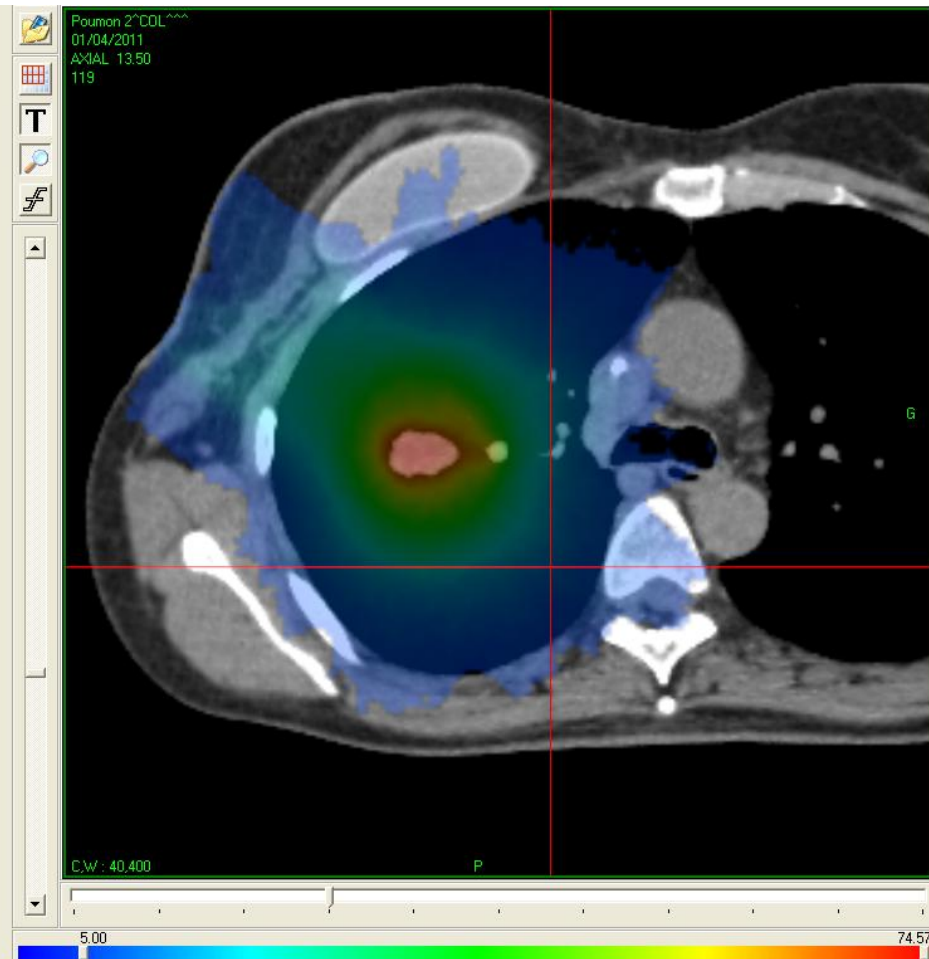

# Case 3 (lesion ~ 4 cm)

Novalis

Cyberknife

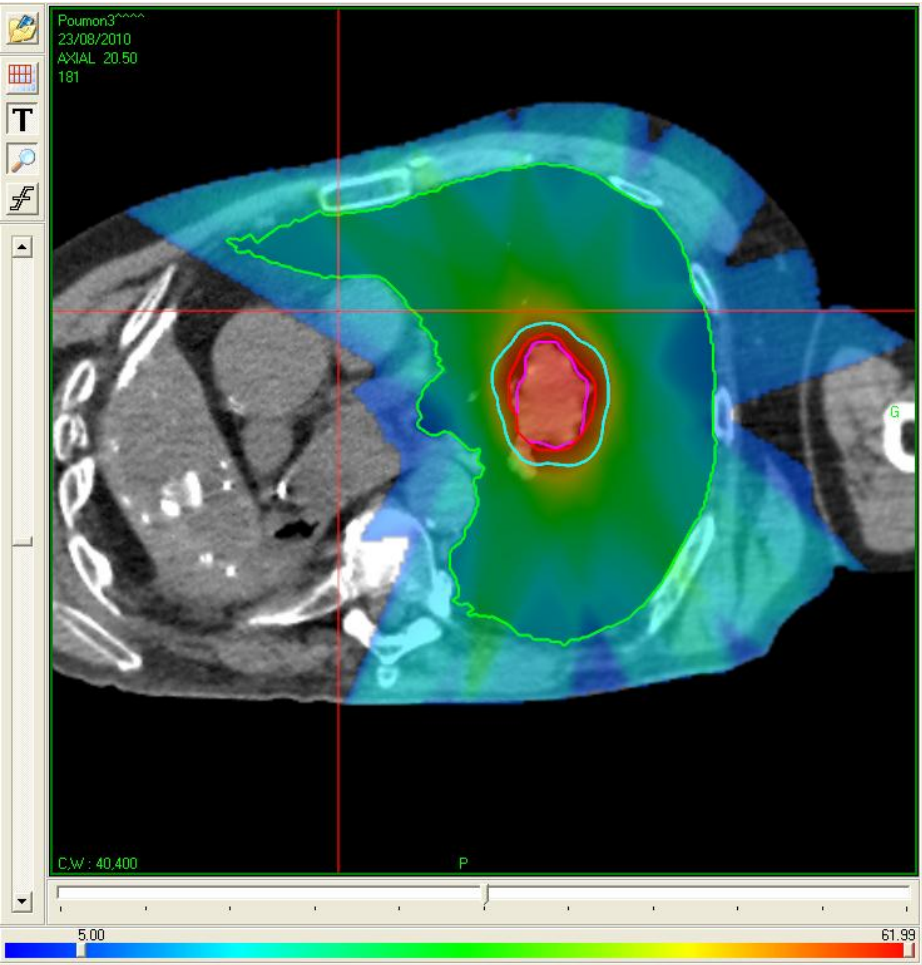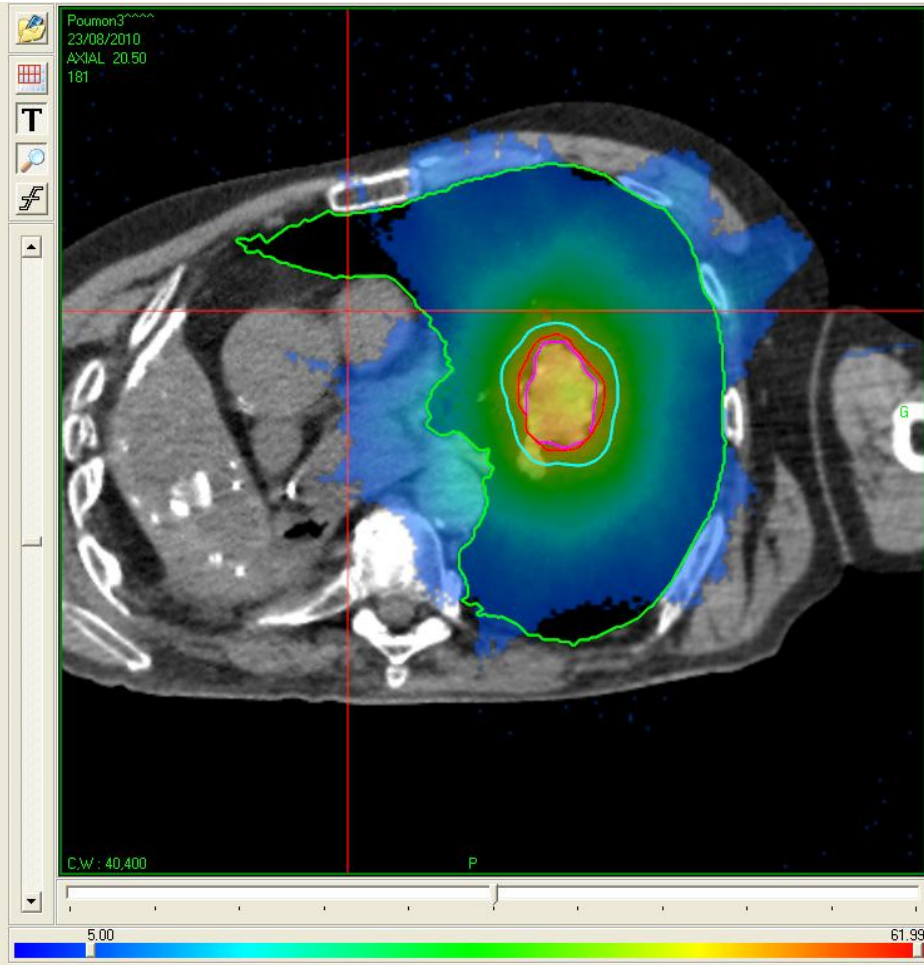

# Case 1

%

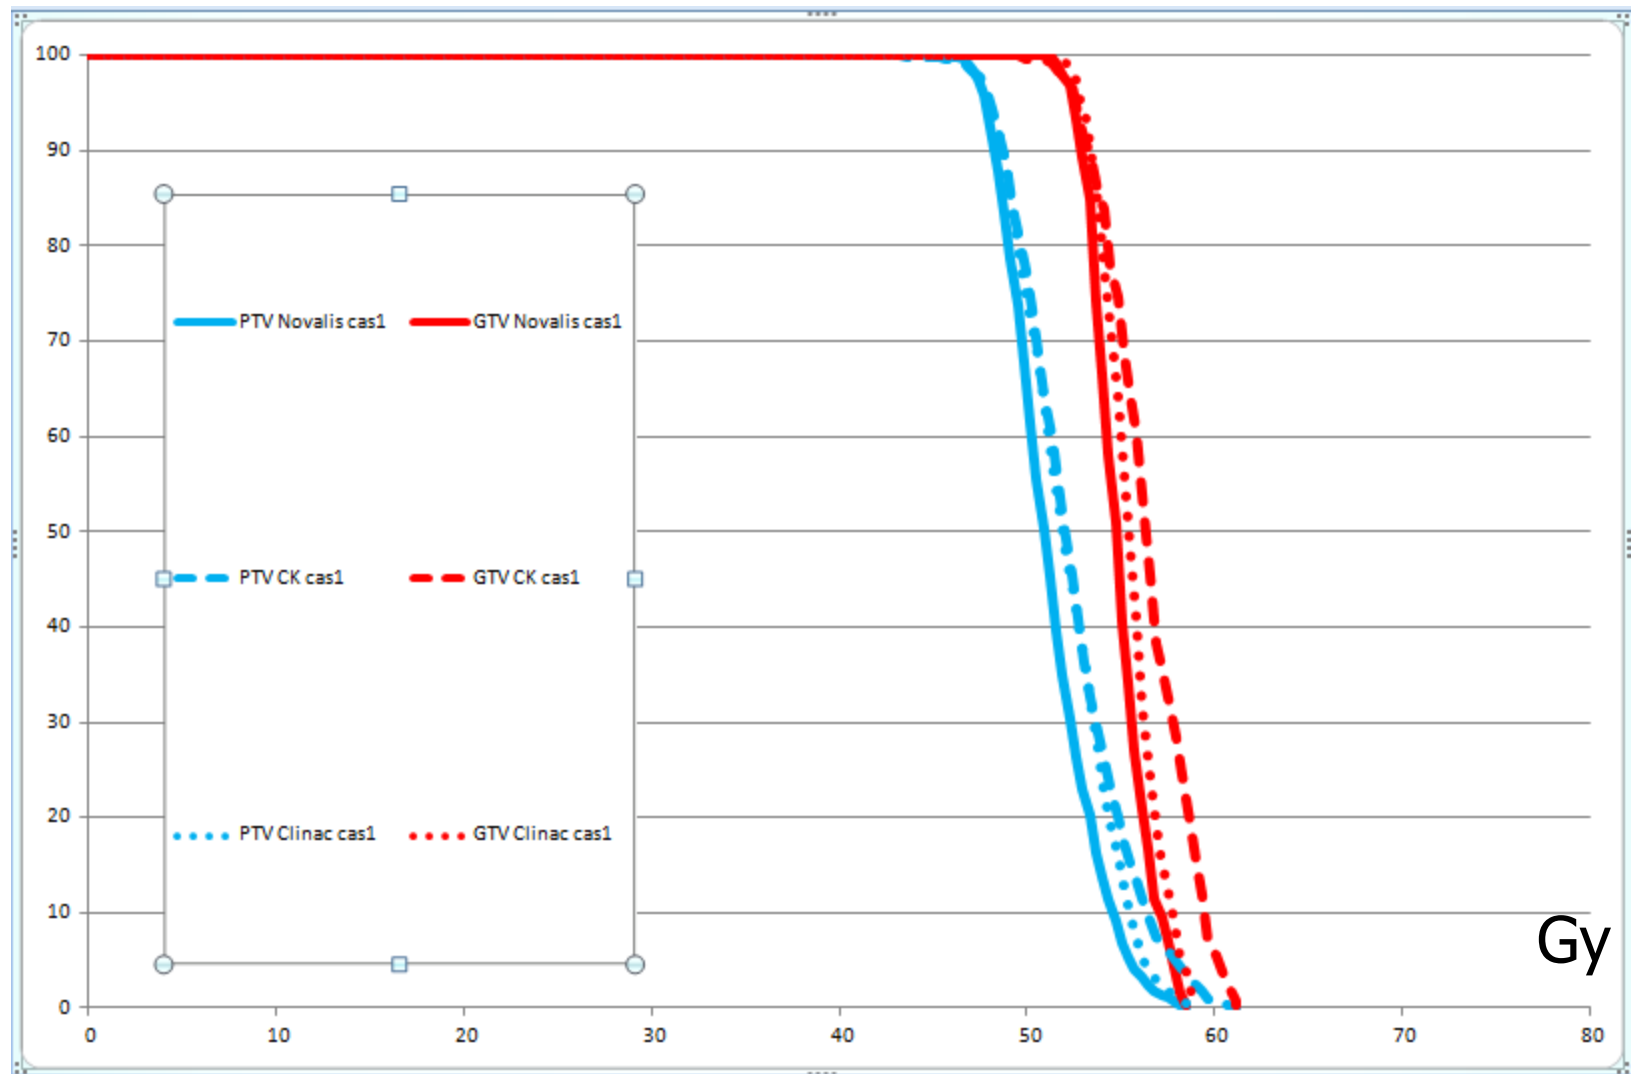

Gy

# Case 1 & 3

%

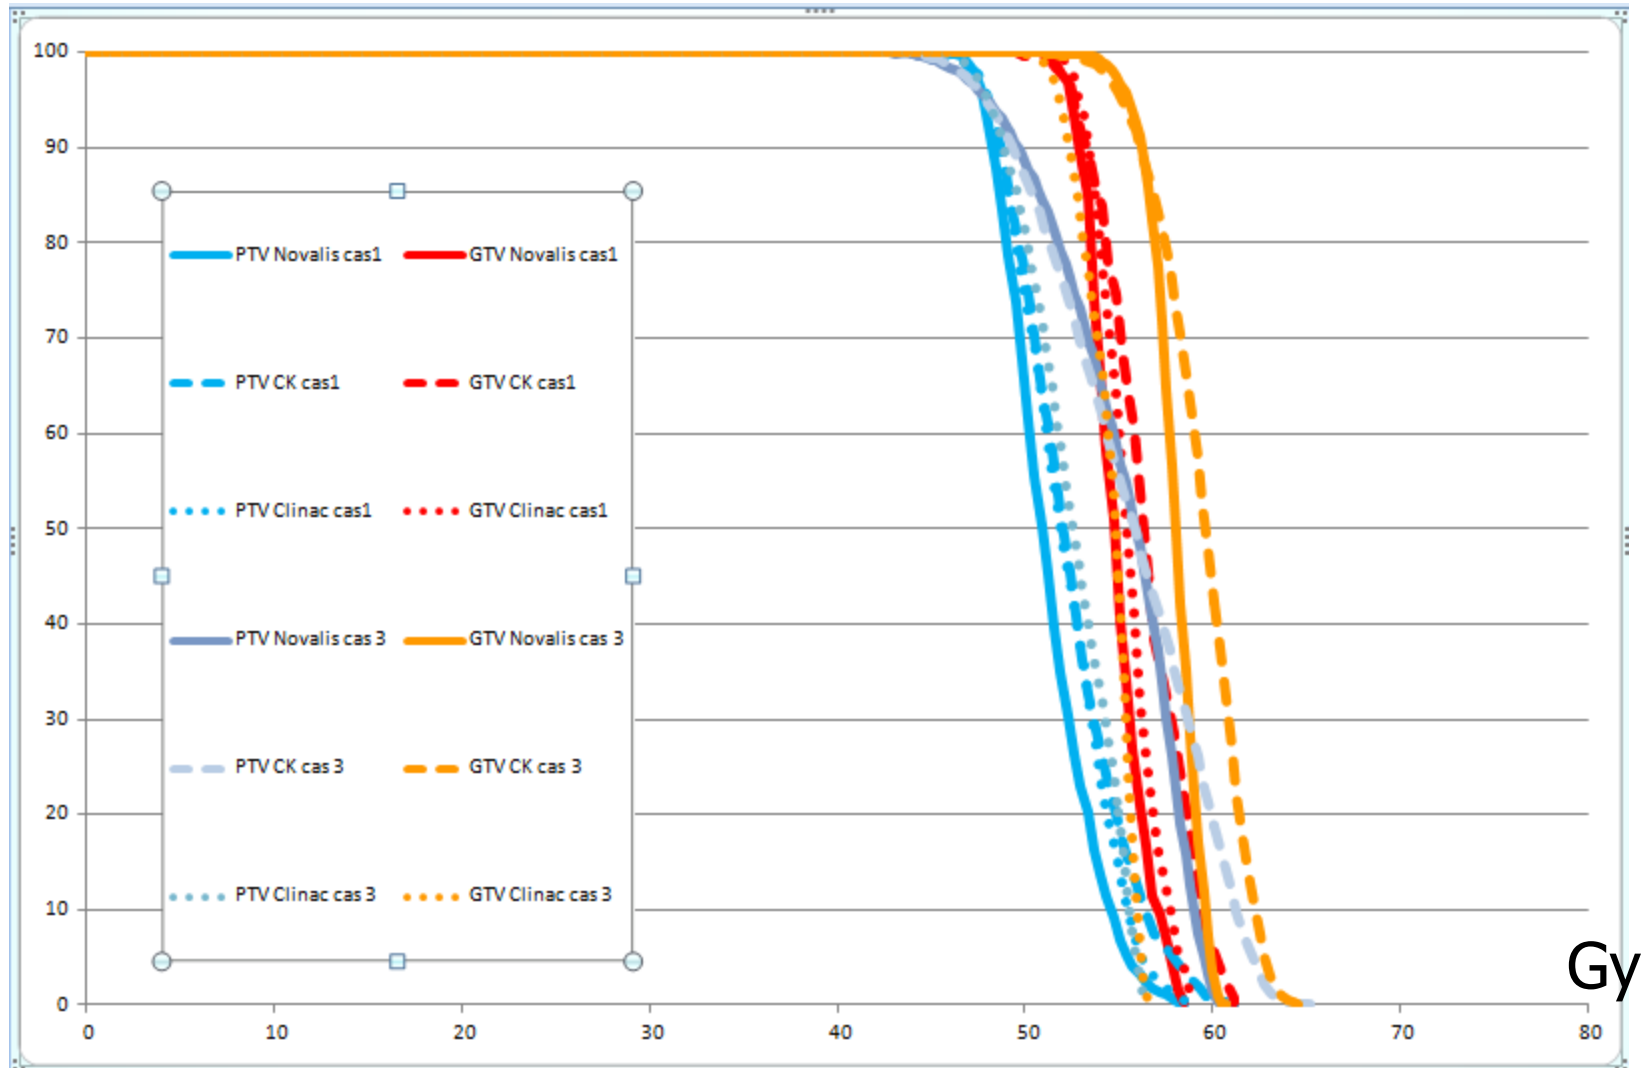

Gy

# Case 1, 2 & 3

%

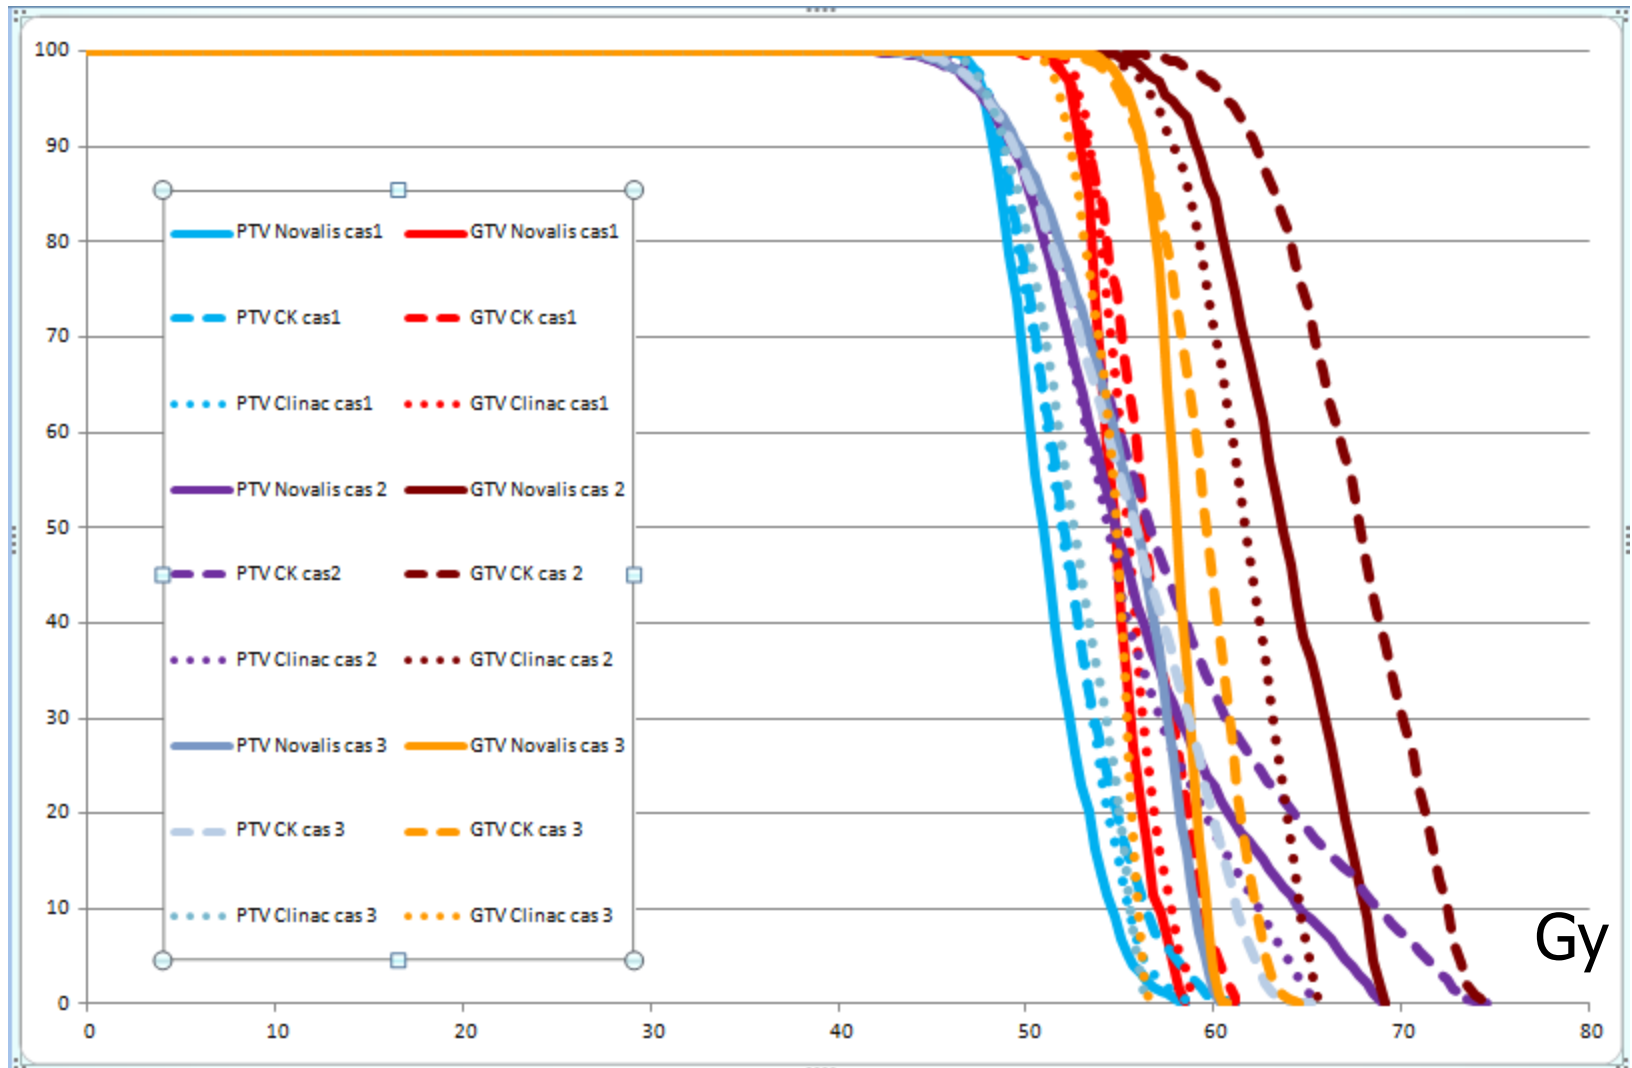

# Case 1, 2 & 3

%

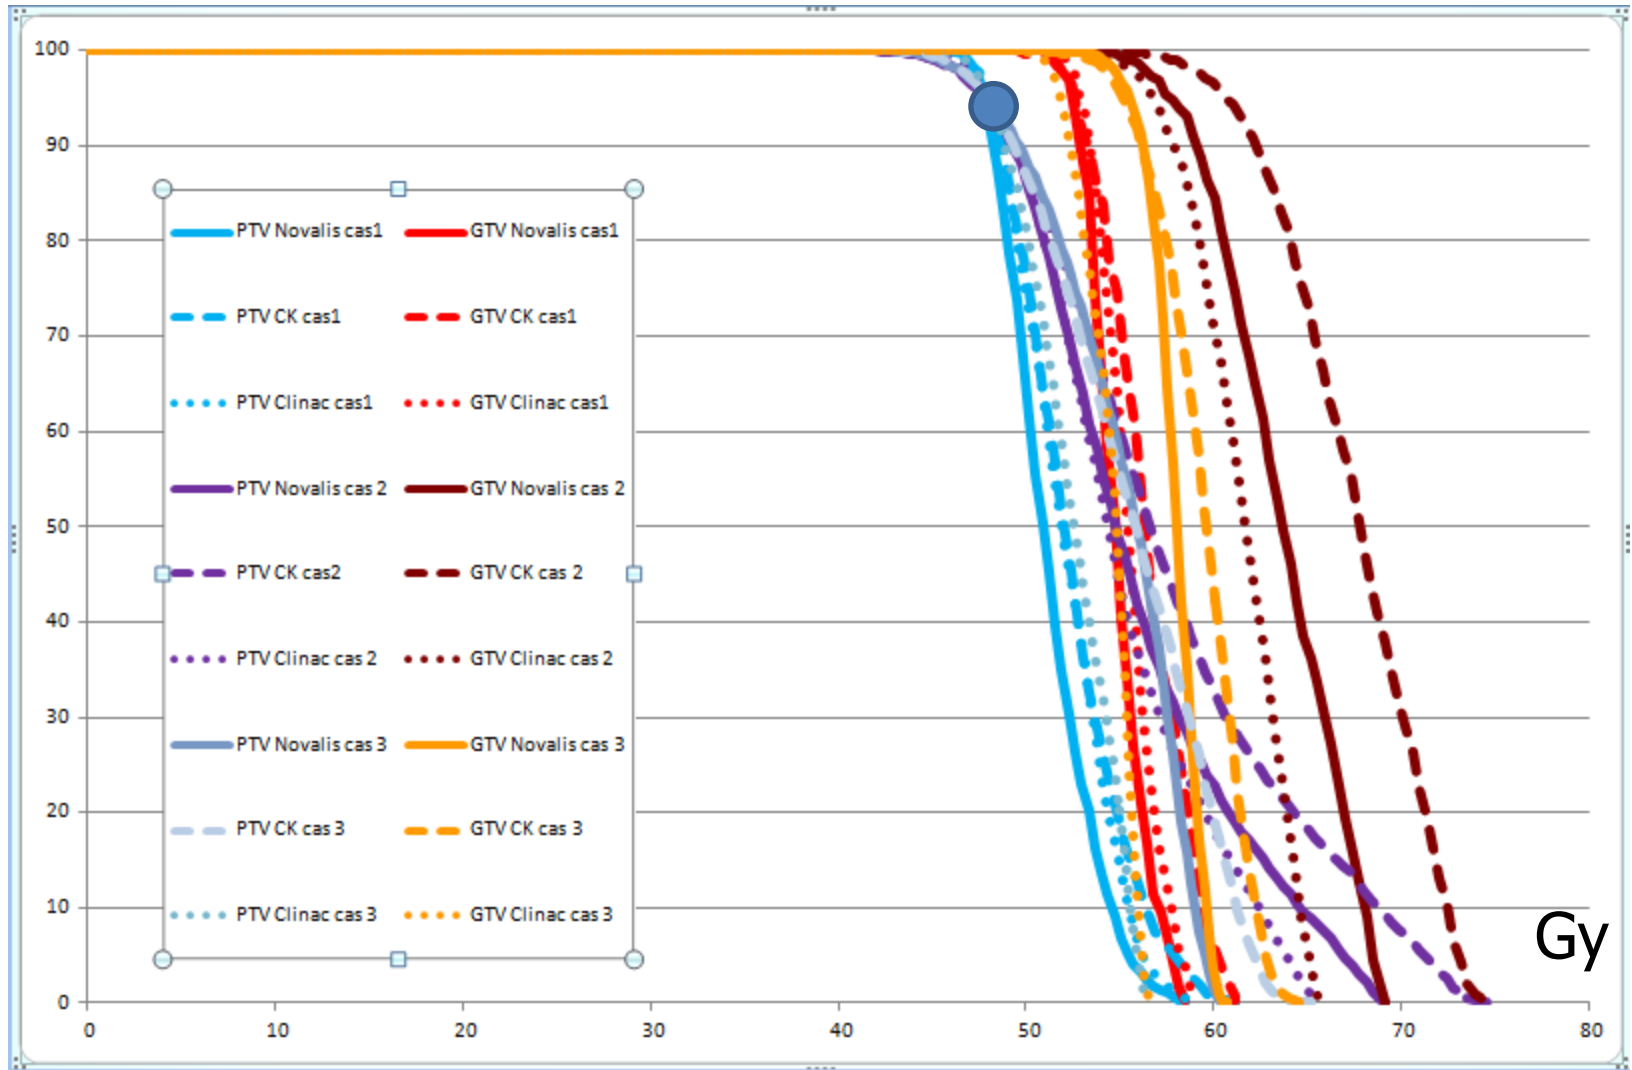

Gy



# Case 1, 2 & 3

%

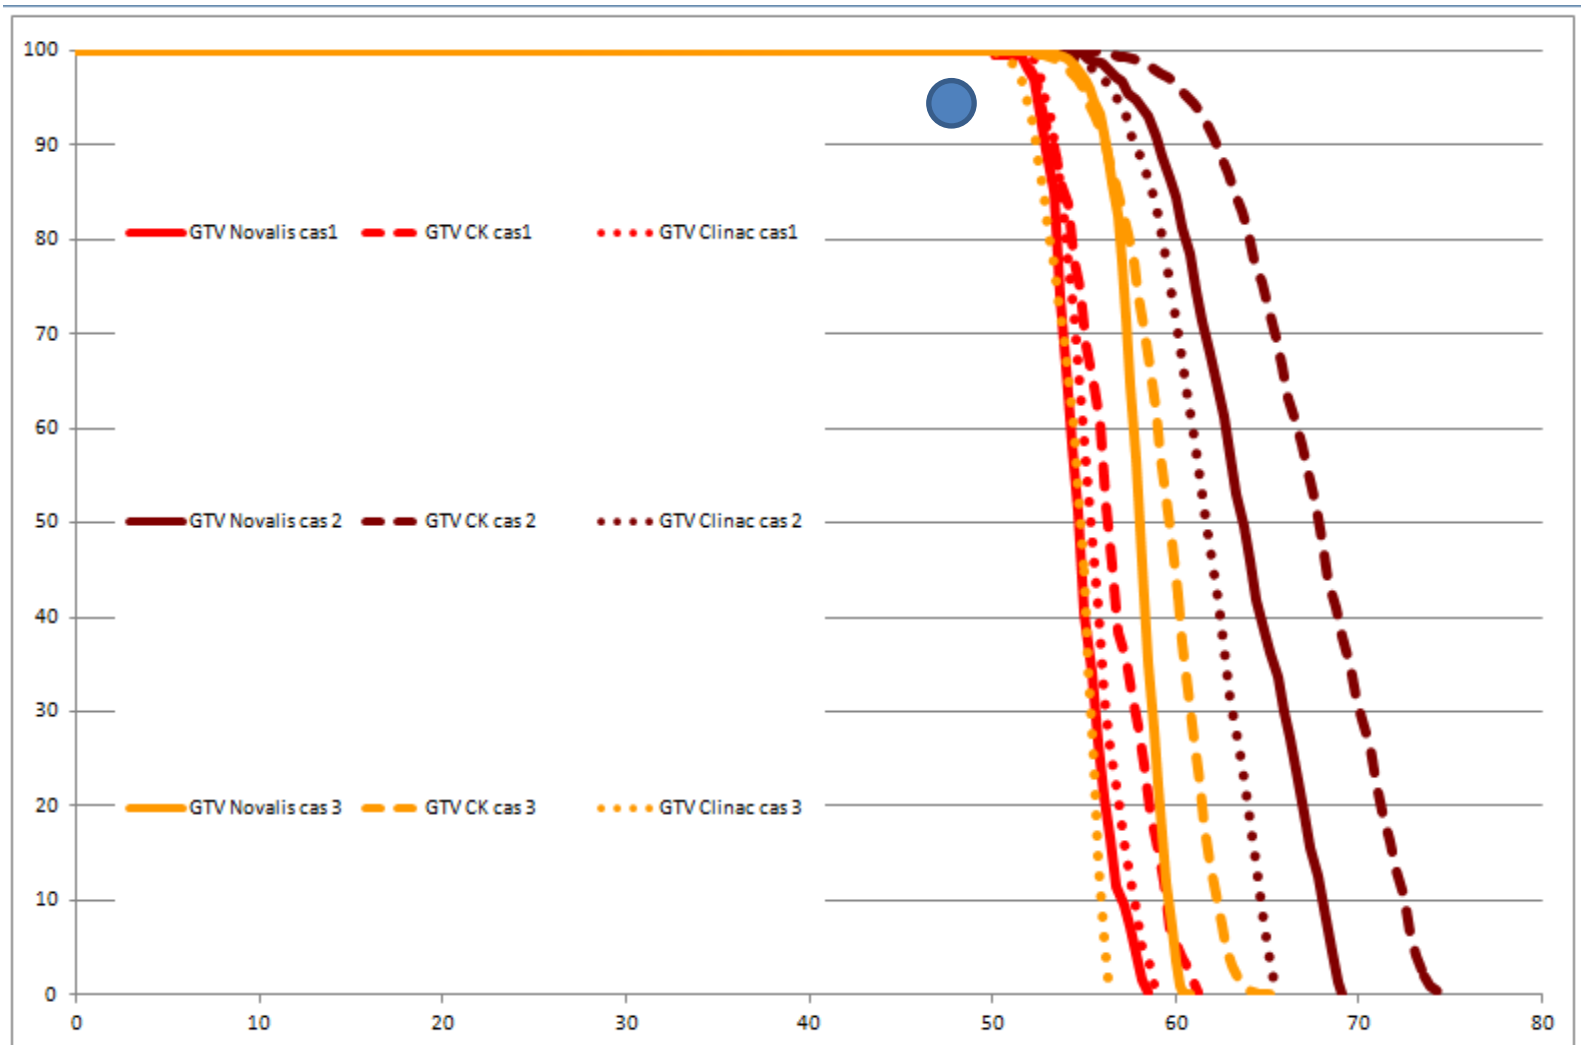

# With a criteria on PTV

- ✓ doses to GTV are variables :
  - Among cases
  - For one case, among platforms

# If we prescribe on GTV median dose (D50%)

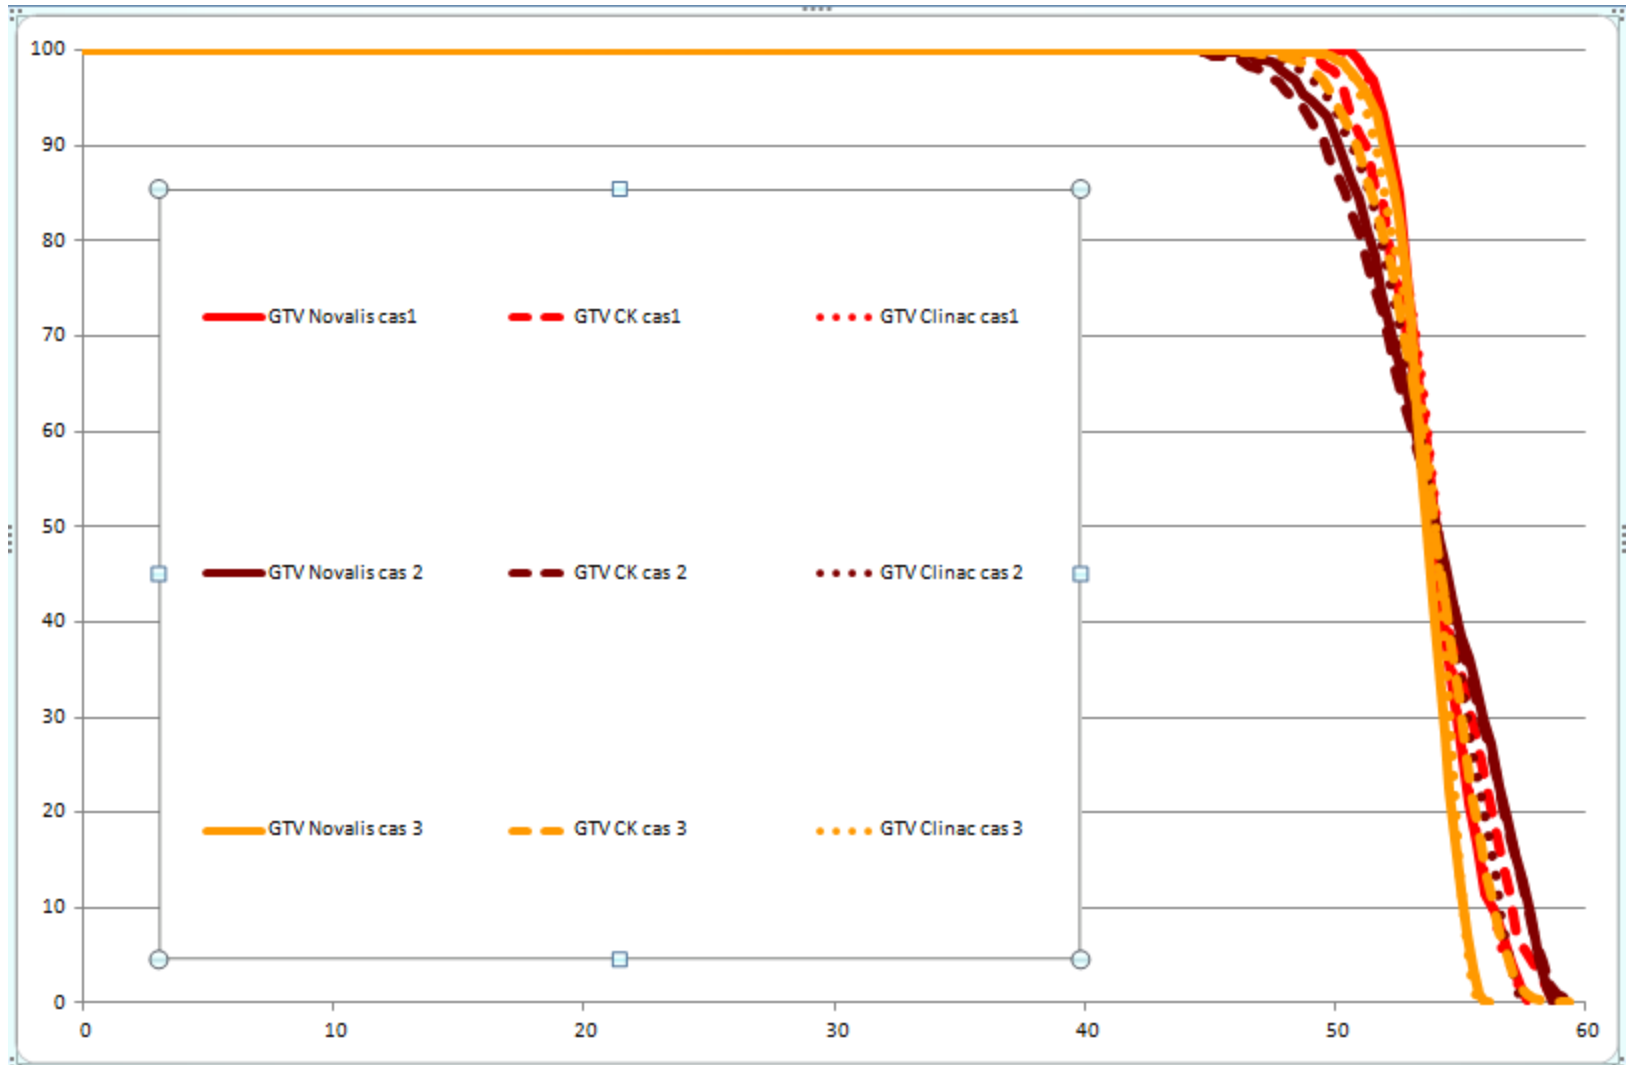

# Conclusion

- ✓ Use type B algorithms
- ✓ At least report GTV D50%, D98%
- ✓ We suggest to prescribe on GTV D50%
